# Supplementary material
Source: publisher figshare collection journal article supplement (https://frontiersin.figshare.com/ndownloader/files/14520818)

**Supplementary Material S3:** Types of microparticles ingested by dissected specimens. (A) Station 1485 - Ingested microfibre by *P. anguicomus.* Scale: 0.2mm. (B) Station 1485 - Ingested microfibre by *S. vermicularis.* Scale: 0.2mm. (C) Station 1485 - Ingested microplastic and microfibre by *O. balli*. Scale: 0.1mm. (D) Station 1487 - Ingested microfibre by *P. anguicomus*. Scale: 0.2mm. (E) Station 1490 - Ingested microfibre *by P. anguicomus.* Scale: 0.2mm. (F) Station 1491 - Ingested microfibre by *M. phaseolina*. Scale: 0.5mm. (G) Station 1495 - Ingested microfibre by *M. phaseolina*. Scale: 0.2mm. (H) Station 1495 - Ingested microfibre by *O. balli*. Scale: 0.2mm.
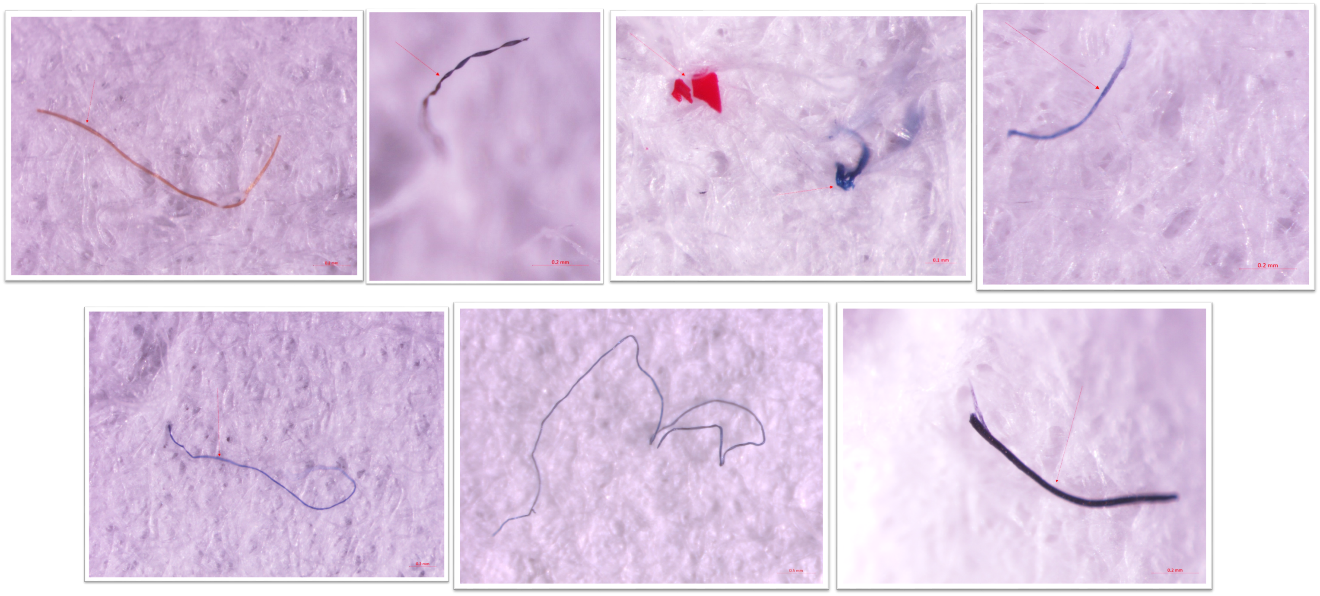

Supplement: Supplementary file 1 [file 14520818]
